# Supplementary material
Source: PubMed Central journal article supplement (PMC3238424)
Supplement: 1556-276X-5-302-S1.pdf [file 1556-276X-5-302-S1.pdf]

supporting information

for

# One-pot Green Synthesis and Bioapplication of L-Arginine-capped Superparamagnetic Fe<sub>3</sub>O<sub>4</sub> Nanoparticles

Yongchao Lai<sup>a</sup>, Weiwei Yin<sup>a</sup>, Jinting Liu<sup>a</sup>, Rimo Xi<sup>a, b</sup> and Jinhua Zhan<sup>a\*</sup>

*a ) Key Laboratory for Colloid & Interface Chemistry of Education Ministry, Department of Chemistry, Shandong University,*

*Jinan 250100, P.R. China.*

*b) College of Pharmaceutical Sciences, Nankai University, Tianjin 300071, P.R. China.*

*E-mail: jhzhhan@sdu.edu.cn; Fax:86-0531-88366280; Tel:86-0531-88365017*

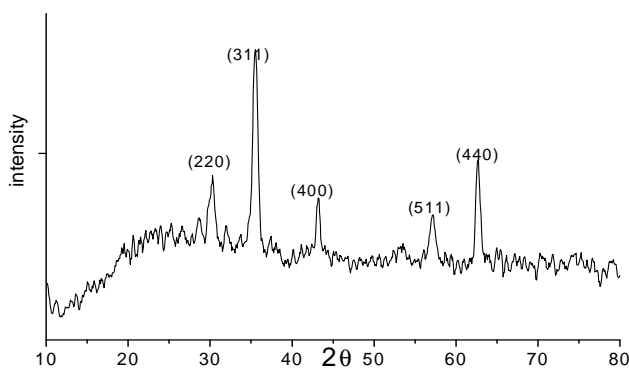

**Fig. S1.** The XRD pattern of Fe<sub>3</sub>O<sub>4</sub> nanoparticles.

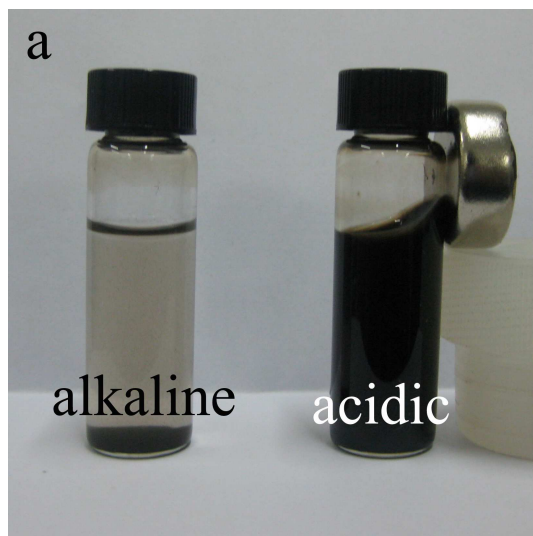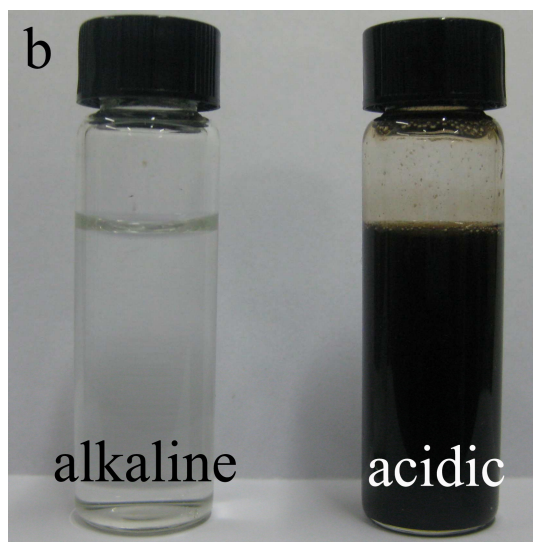

**Fig. S2.** (a) Photos of  $\text{Fe}_3\text{O}_4$  nanoparticles dispersed in alkaline (left) and acidic (right) solutions which can be moved by a magnet. (b) Photos of samples after are filtrated by  $0.45\mu\text{m}$  filtration membrane.
